# Supplementary material for: Evolution of the Oligopeptide Transporter Family
Source: PubMed Central journal article supplement — J Membr Biol. 2011 Feb 24;240(2):89–110. doi: 10.1007/s00232-011-9347-9 (PMC3061005; doi:10.1007/s00232-011-9347-9), 2011-02-24

# CLUSTAL 2.0.12 MULTIPLE SEQUENCE ALIGNMENT

File: /Users/saierlab/Desktop/xyyy.ps  
Page 1 of 22

Date: Tue Feb 8 17:07:14 2011

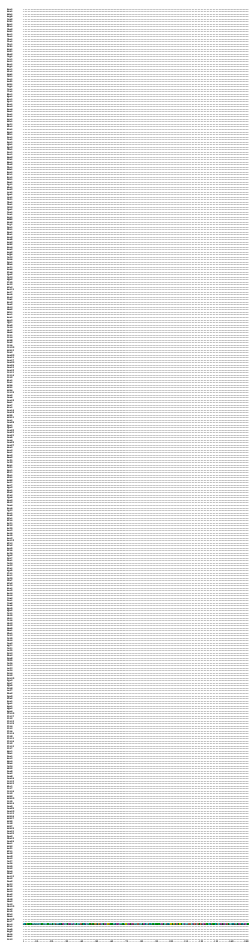

# CLUSTAL 2.0.12 MULTIPLE SEQUENCE ALIGNMENT

File: /Users/saierlab/Desktop/xyyy.ps  
Page 2 of 22

Date: Tue Feb 8 17:07:14 2011

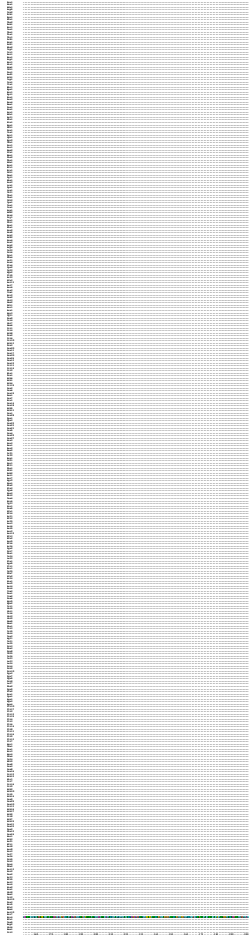

# CLUSTAL 2.0.12 MULTIPLE SEQUENCE ALIGNMENT

File: /Users/saierlab/Desktop/xyyy.ps  
Page 3 of 22

Date: Tue Feb 8 17:07:14 2011

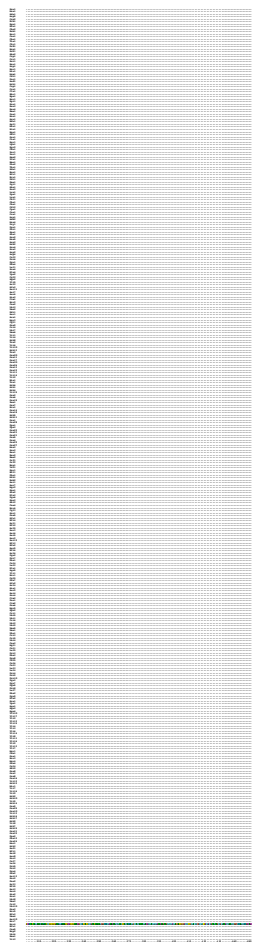

# CLUSTAL 2.0.12 MULTIPLE SEQUENCE ALIGNMENT

File: /Users/saierlab/Desktop/xyyy.ps  
Page 4 of 22

Date: Tue Feb 8 17:07:14 2011

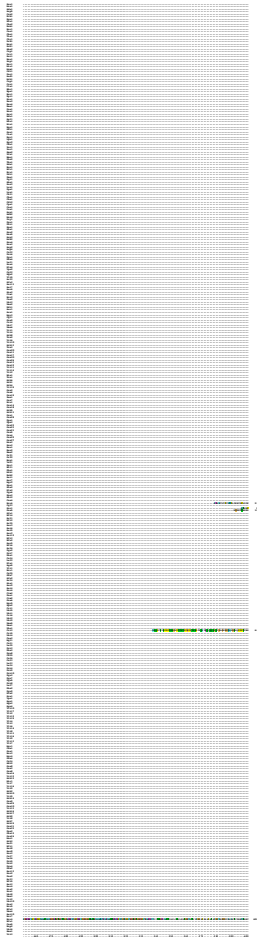

# CLUSTAL 2.0.12 MULTIPLE SEQUENCE ALIGNMENT

File: /Users/saierlab/Desktop/xyyy.ps  
Page 5 of 22

Date: Tue Feb 8 17:07:14 2011

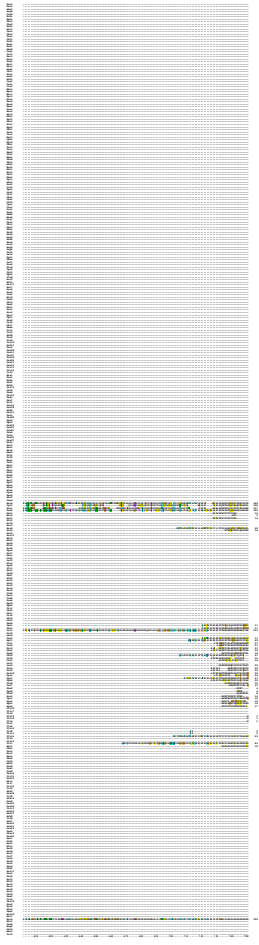

# CLUSTAL 2.0.12 MULTIPLE SEQUENCE ALIGNMENT

File: /Users/saierlab/Desktop/xyyy.ps  
Page 6 of 22

Date: Tue Feb 8 17:07:14 2011

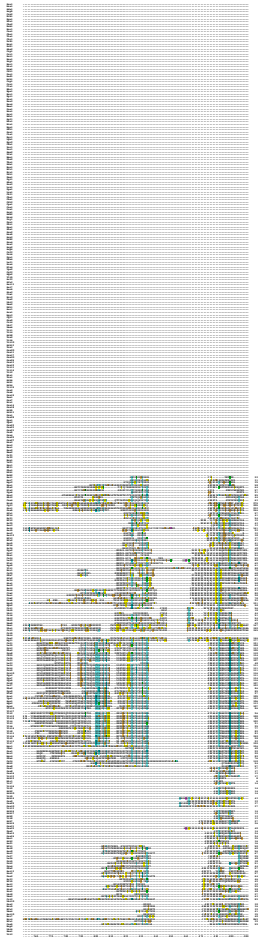

# CLUSTAL 2.0.12 MULTIPLE SEQUENCE ALIGNMENT

File: /Users/saierlab/Desktop/xyyy.ps  
Page 7 of 22

Date: Tue Feb 8 17:07:14 2011

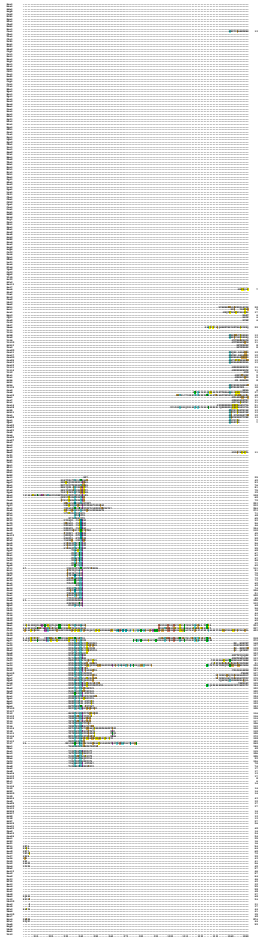

# CLUSTAL 2.0.12 MULTIPLE SEQUENCE ALIGNMENT

File: /Users/saierlab/Desktop/xyyy.ps  
Page 8 of 22

Date: Tue Feb 8 17:07:14 2011

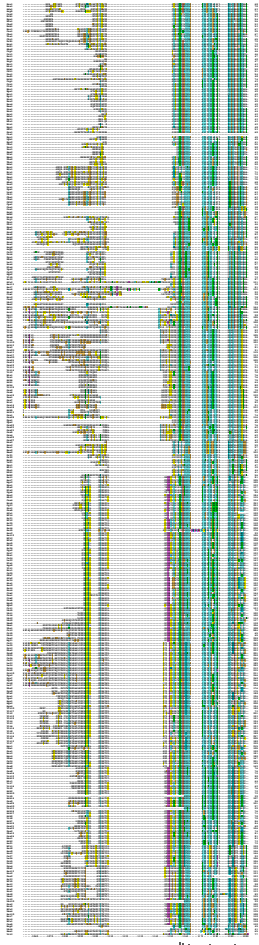



# CLUSTAL 2.0.12 MULTIPLE SEQUENCE ALIGNMENT

File: /Users/saierlab/Desktop/xyyy.ps  
Page 9 of 22

Date: Tue Feb 8 17:07:14 2011

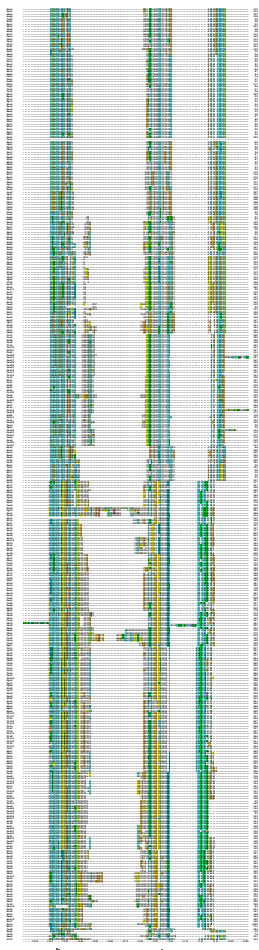

# CLUSTAL 2.0.12 MULTIPLE SEQUENCE ALIGNMENT

File: /Users/saierlab/Desktop/xyyy.ps  
Page 10 of 22

Date: Tue Feb 8 17:07:14 2011

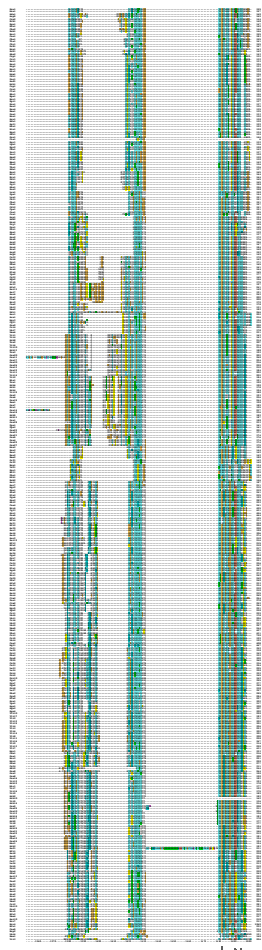

# CLUSTAL 2.0.12 MULTIPLE SEQUENCE ALIGNMENT

File: /Users/saierlab/Desktop/xyyy.ps  
Page 11 of 22

Date: Tue Feb 8 17:07:14 2011

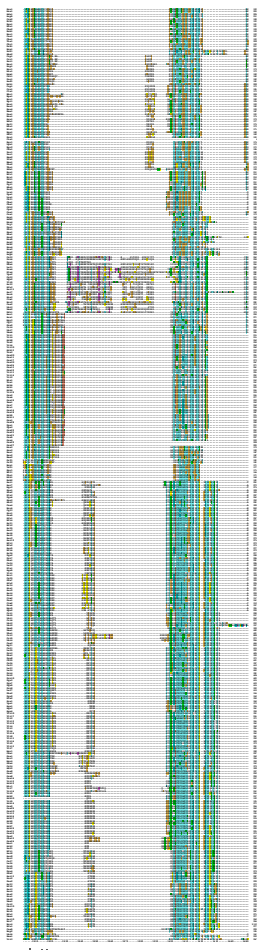

# CLUSTAL 2.0.12 MULTIPLE SEQUENCE ALIGNMENT

File: /Users/saierlab/Desktop/xyyy.ps  
Page 12 of 22

Date: Tue Feb 8 17:07:14 2011

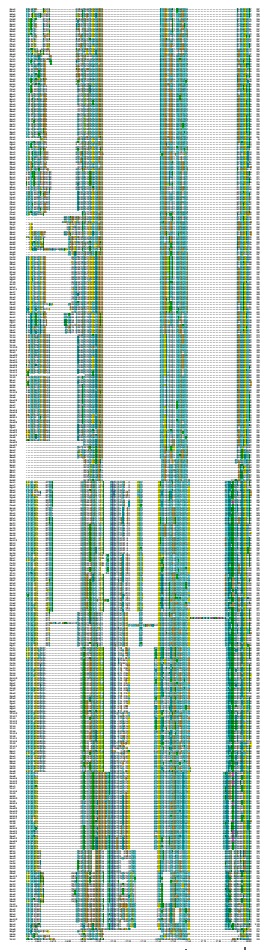

# CLUSTAL 2.0.12 MULTIPLE SEQUENCE ALIGNMENT

File: /Users/saierlab/Desktop/xyyy.ps  
Page 13 of 22

Date: Tue Feb 8 17:07:14 2011

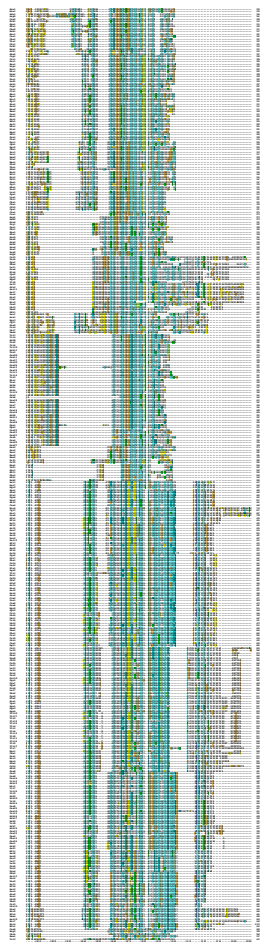

# CLUSTAL 2.0.12 MULTIPLE SEQUENCE ALIGNMENT

File: /Users/saierlab/Desktop/xyyy.ps  
Page 14 of 22

Date: Tue Feb 8 17:07:14 2011

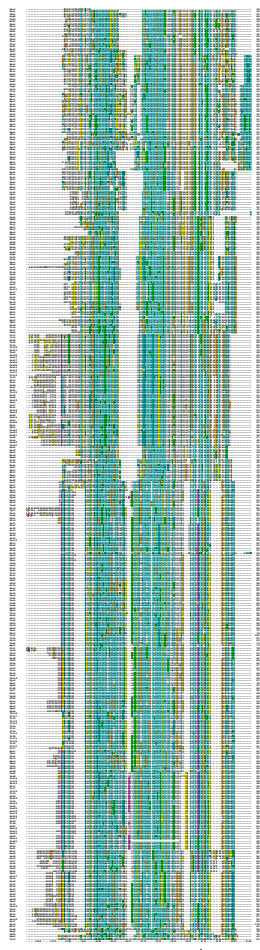

# CLUSTAL 2.0.12 MULTIPLE SEQUENCE ALIGNMENT

File: /Users/saierlab/Desktop/xyyy.ps  
Page 15 of 22

Date: Tue Feb 8 17:07:14 2011

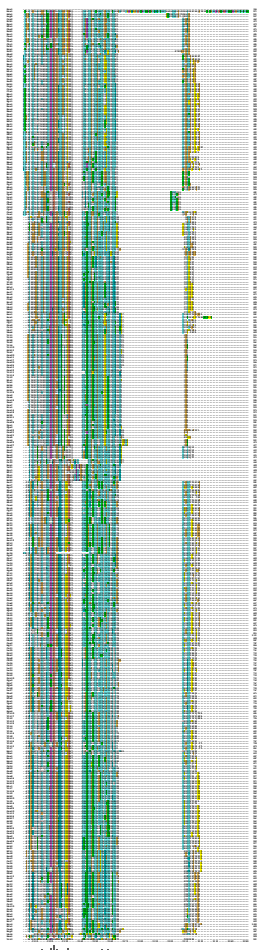

# CLUSTAL 2.0.12 MULTIPLE SEQUENCE ALIGNMENT

File: /Users/saierlab/Desktop/xyyy.ps  
Page 16 of 22

Date: Tue Feb 8 17:07:14 2011

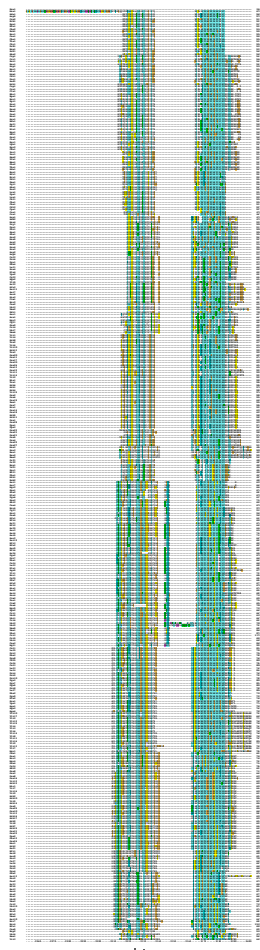



# CLUSTAL 2.0.12 MULTIPLE SEQUENCE ALIGNMENT

File: /Users/saierlab/Desktop/xyyy.ps  
Page 17 of 22

Date: Tue Feb 8 17:07:14 2011

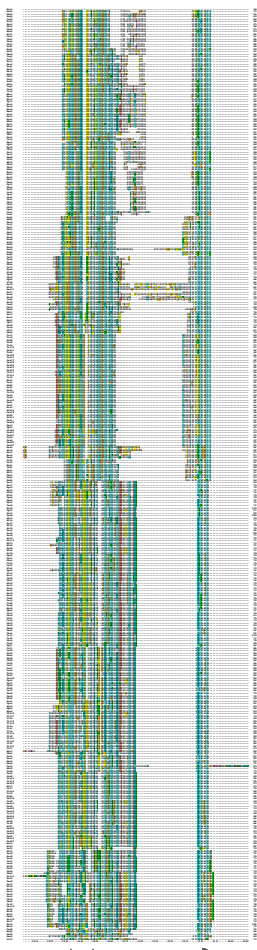

# CLUSTAL 2.0.12 MULTIPLE SEQUENCE ALIGNMENT

File: /Users/saierlab/Desktop/xyyy.ps  
Page 18 of 22

Date: Tue Feb 8 17:07:14 2011

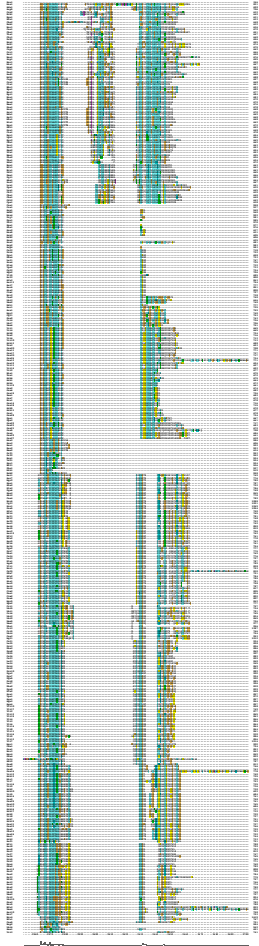

# CLUSTAL 2.0.12 MULTIPLE SEQUENCE ALIGNMENT

File: /Users/saierlab/Desktop/xyyy.ps  
Page 19 of 22

Date: Tue Feb 8 17:07:14 2011

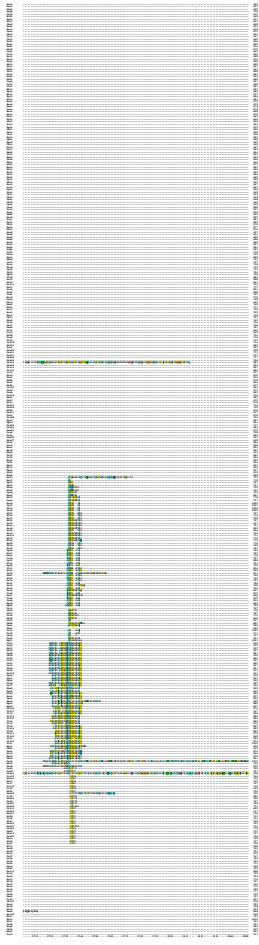

# CLUSTAL 2.0.12 MULTIPLE SEQUENCE ALIGNMENT

File: /Users/saierlab/Desktop/xyyy.ps  
Page 20 of 22

Date: Tue Feb 8 17:07:14 2011

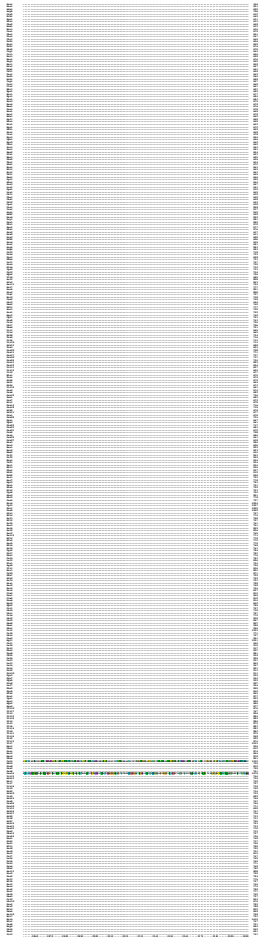

# CLUSTAL 2.0.12 MULTIPLE SEQUENCE ALIGNMENT

File: /Users/saierlab/Desktop/xyyy.ps  
Page 21 of 22

Date: Tue Feb 8 17:07:14 2011

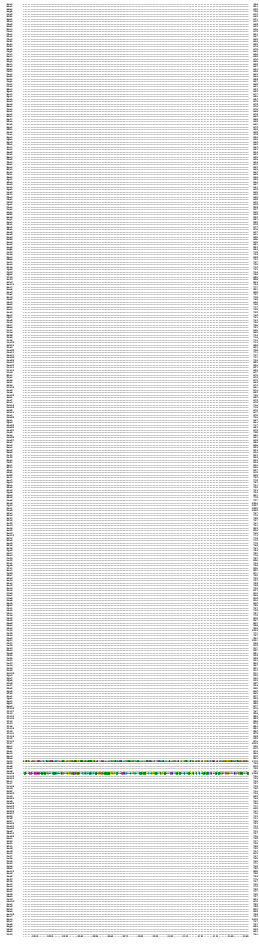

# CLUSTAL 2.0.12 MULTIPLE SEQUENCE ALIGNMENT

File: /Users/saierlab/Desktop/xyyy.ps  
Page 22 of 22

Date: Tue Feb 8 17:07:14 2011

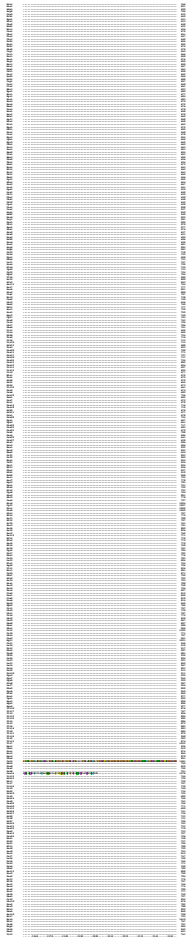

Supplement: 232_2011_9347_MOESM3_ESM.pdf [file 232_2011_9347_MOESM3_ESM.pdf]
