# Supplementary material for: Evolution of the Oligopeptide Transporter Family
Source: PubMed Central journal article supplement — J Membr Biol. 2011 Feb 24;240(2):89–110. doi: 10.1007/s00232-011-9347-9 (PMC3061005; doi:10.1007/s00232-011-9347-9), 2011-02-24
Supplement: 232_2011_9347_MOESM2_ESM.pdf [file 232_2011_9347_MOESM2_ESM.pdf]

**Figure S2.** Dendrogram of all 325 OPT family proteins included in this study corresponding to the phylogenetic tree shown in Figure 1.

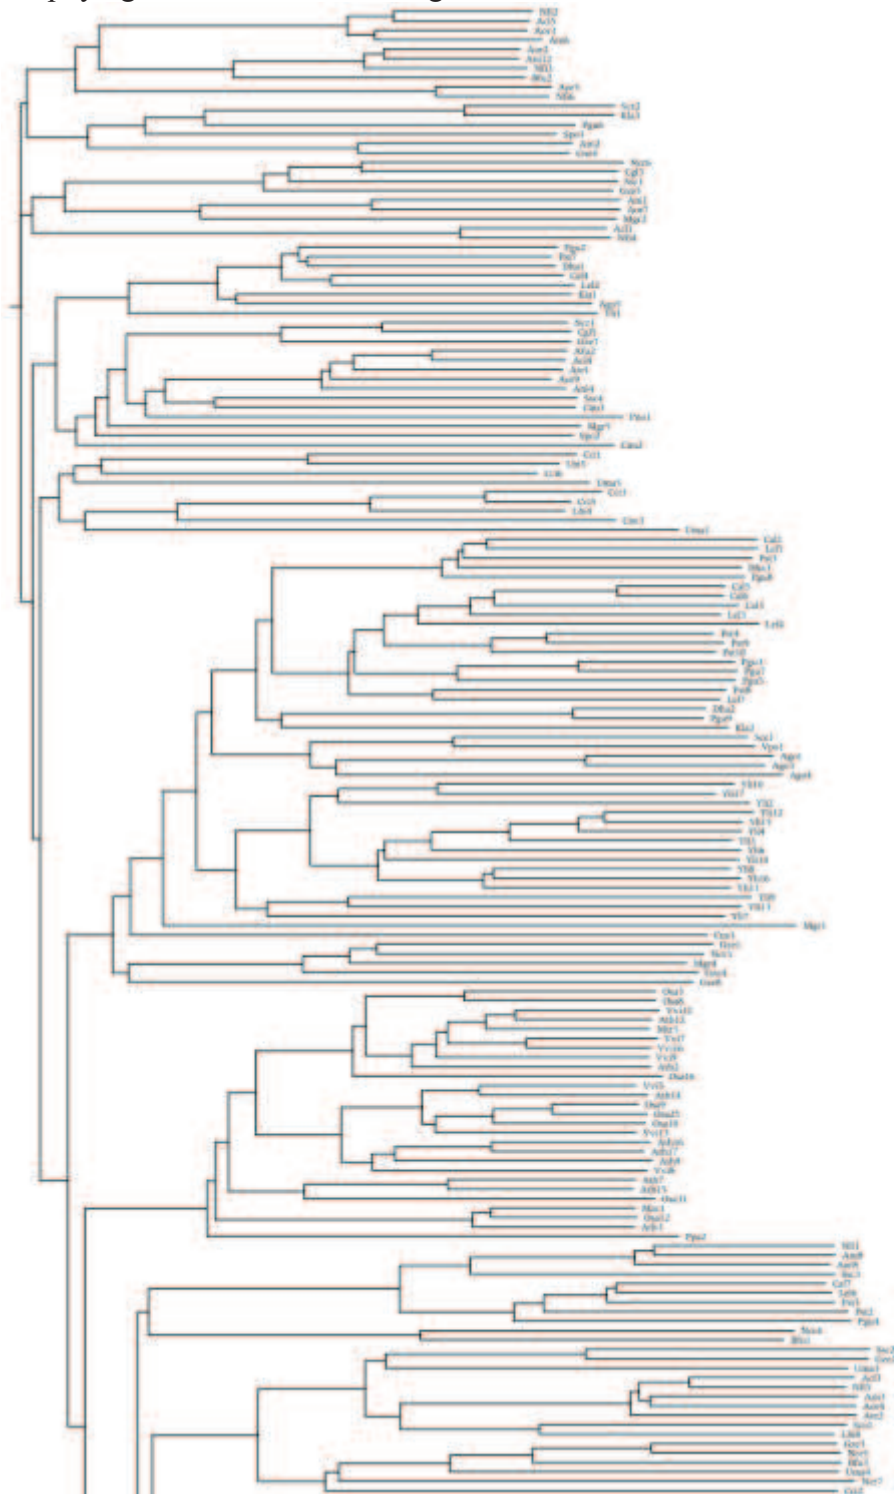

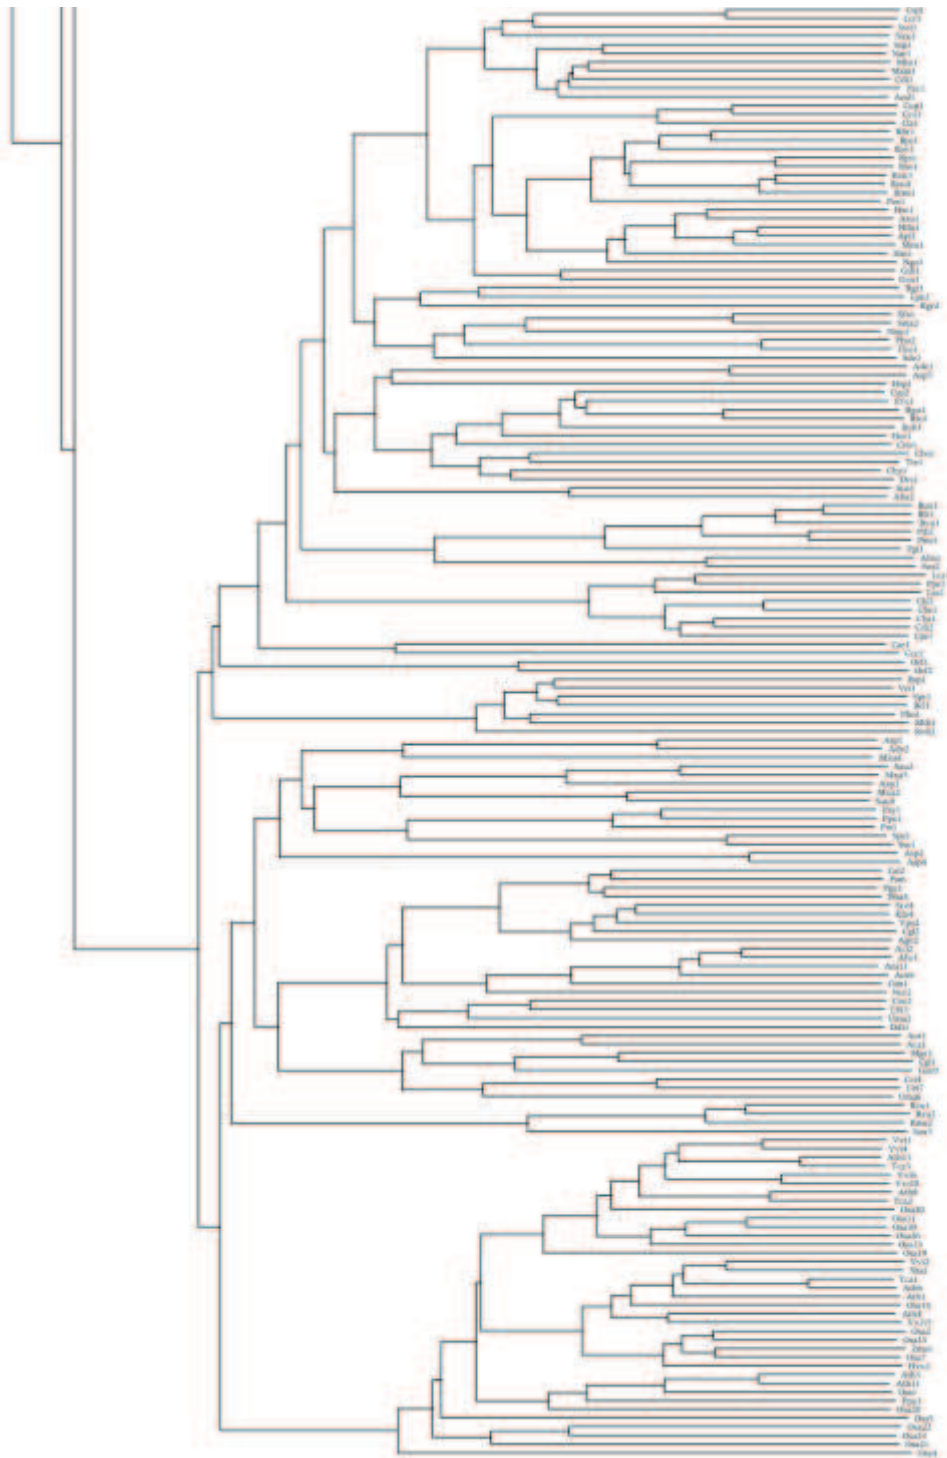

Figure S2. (Continued)
